# Supplementary material
Source: MDPI journal article supplement (https://www.mdpi.com/2076-3417/12/3/1376)
Supplement: s1 [file s1]

# Vapor-Phase Incorporation of Ge in CZTSe Absorbers for Improved Stability of High-Efficiency Kesterite Solar Cells

David Nowak <sup>†,\*</sup>, Talat Khonsor <sup>†</sup>, Devendra Pareek and Levent Güтай

Institute of Physics—Ultrafast Nanoscale Dynamics (UND), Carl von Ossietzky University of Oldenburg, D-26129 Oldenburg, Germany; talat.khonsor@uol.de (T.K.); devendra.pareek@uol.de (D.P.); levent.guetay@uol.de (L.G.)

\* Correspondence: david.nowak@uni-oldenburg.de

<sup>†</sup> These authors contributed equally to this work.

**Citation:** Nowak, D.; Khonsor, T.; Pareek, D.; Güтай, L. Vapor-Phase Incorporation of Ge in CZTSe Absorbers for Improved Stability of High-Efficiency Kesterite Solar Cells. *Appl. Sci.* **2022**, *12*, 1376. <https://doi.org/10.3390/app12031376>

Academic Editor: Samira Khelifi

Received: 1 December 2021

Accepted: 21 January 2022

Published: 27 January 2022

**Publisher's Note:** MDPI stays neutral with regard to jurisdictional claims in published maps and institutional affiliations.

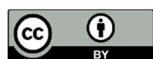

**Copyright:** © 2022 by the authors. Licensee MDPI, Basel, Switzerland. This article is an open access article distributed under the terms and conditions of the Creative Commons Attribution (CC BY) license (<https://creativecommons.org/licenses/by/4.0/>).

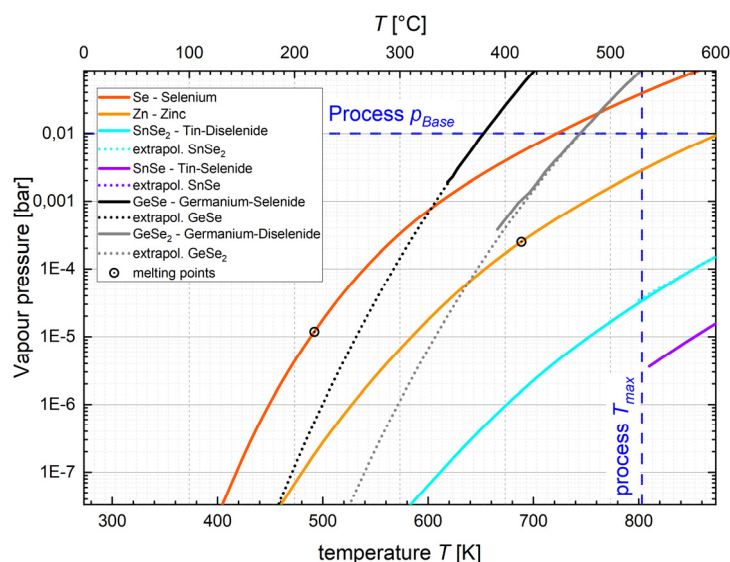

**Figure S1.** Vapor pressure curves for relevant compounds. Data source from [1]–[4].

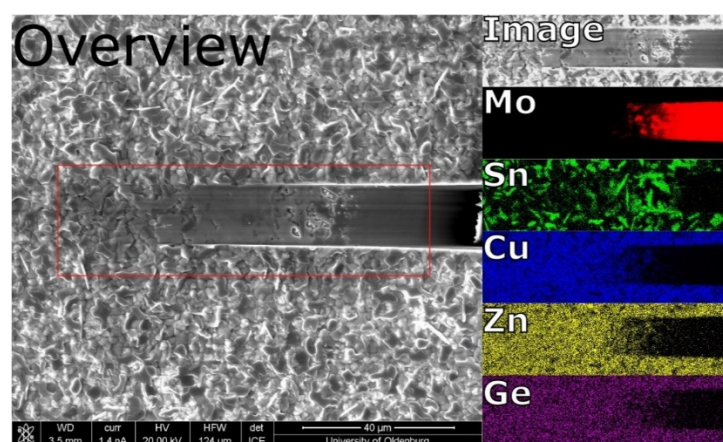

**Figure S2.** Shallow angle FIB cut performed on an inhomogeneous sample to perform a depth resolved EDX mapping for Sn and Ge distribution analysis.

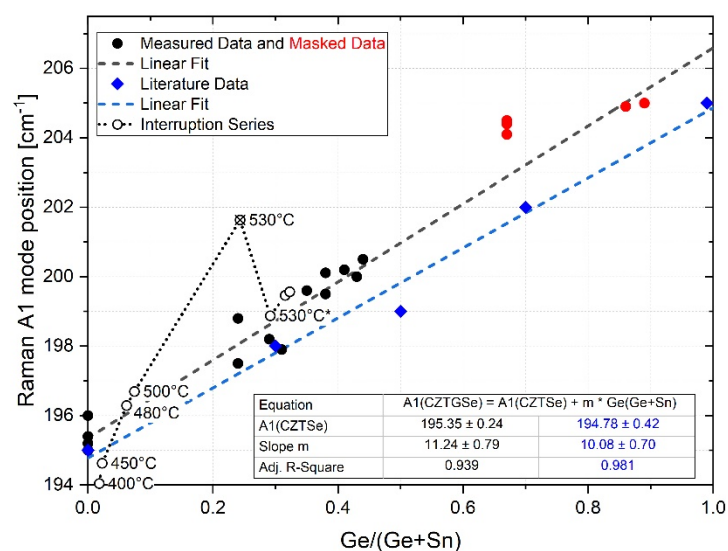

**Figure S3.** Raman A1 peak position vs. Ge/(Ge + Sn) ratio for the produced samples and a comparison to literature values from [5]. The sample labelled with 530 °C from the interruption series does not follow the trend and is therefore expected to have a gradient.

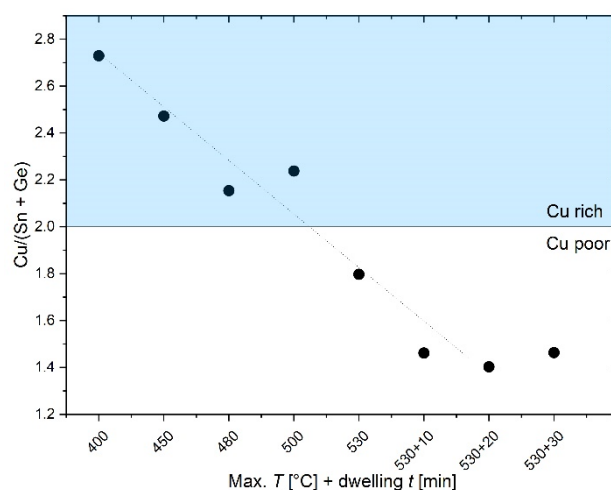

**Figure S4.** Cu/(Ge + Sn) ratio development for the performed interruption series. The switch from Cu/(Sn + Ge) > 2 to < 2 corresponds to the in-process composition shift from Cu-rich to poor via GeSe incorporation.

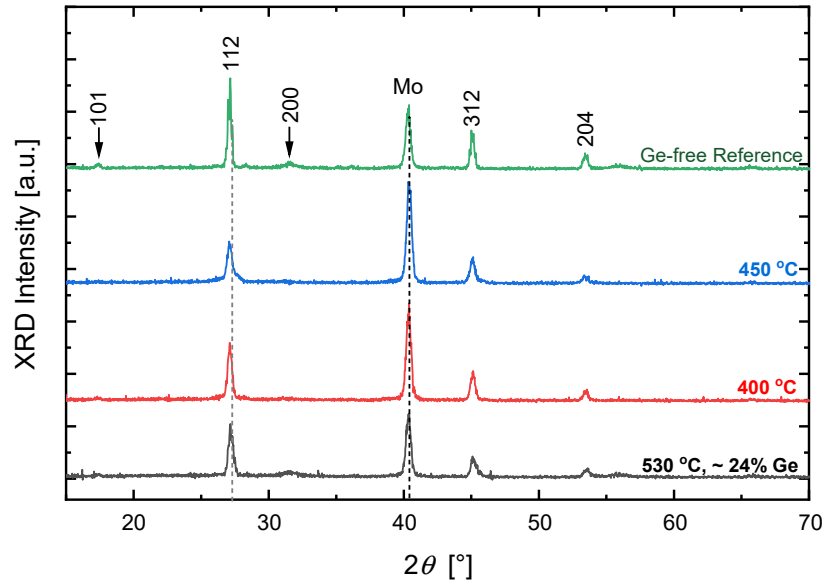

**Figure S5.** X-ray diffractogram of the samples processed: reference (no Ge) and Ge containing samples interrupted at different temperatures.

X-ray diffraction patterns of the reference and Ge incorporated samples are shown in Figure S7. The reference sample shows the main peak intensity corresponding to 112 plane ( $2\theta$  centered around  $27.14^\circ$ ) corresponding to the  $\text{Cu}_2\text{ZnSnSe}_4$  phase. Samples annealed at  $400^\circ\text{C}$  and  $450^\circ\text{C}$  show a very slight peak shifting (i.e.,  $2\theta$  at  $27.16^\circ$ ) indicating a similar Ge content, and the sample annealed at  $530^\circ\text{C}$  shows higher Ge content (i.e., higher peak shifting,  $2\theta$  at  $27.25^\circ$ ), corroborating the observation from Raman and EDX measurements. All the samples show the peaks corresponding to kesterite phase with no signatures of  $\text{SnSe}_{2-x}$  and  $\text{GeSe}_{2-x}$  phases.

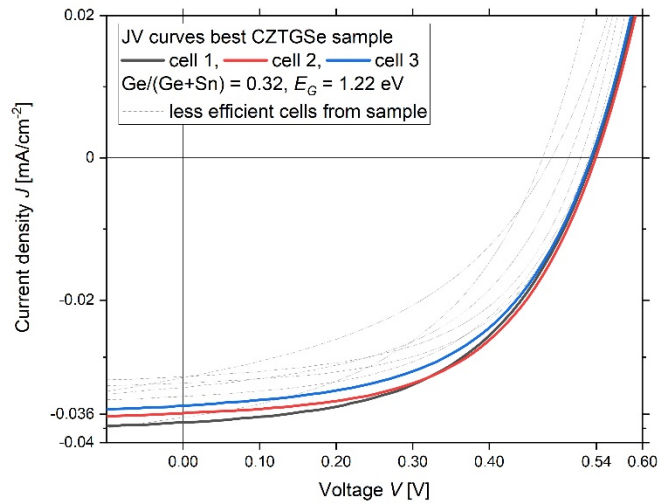

**Figure S6.** Highest PCE IV curves for sample with the best cell from the study.

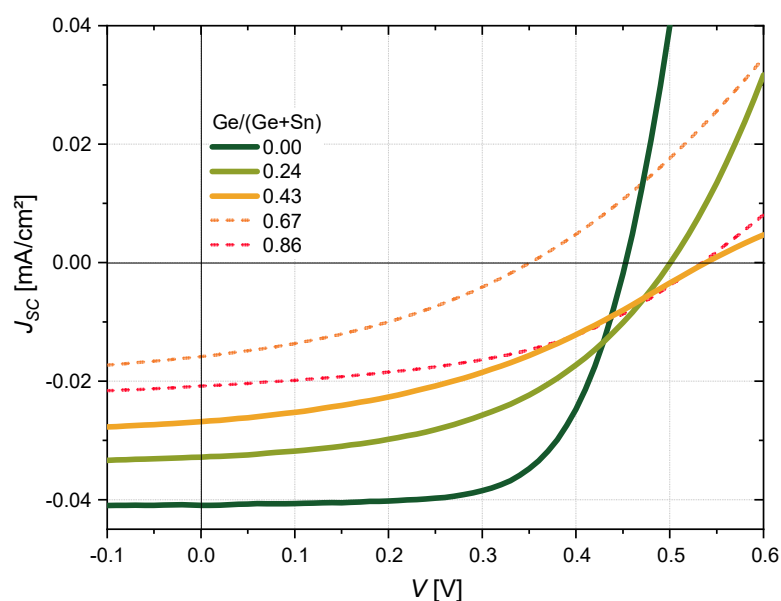

**Figure S7:** IV curves of the best samples for Ge/(Ge+Sn) groups shown in the main text in Figure 3. Dashed lines correspond to the masked data mentioned in the main text.

## References

1. R. E. Honig, "Vapor Pressure Data for the More Common Elements.pdf," *R.C.A. Rev.* **18**, pp. 195–204, 1957.
2. Robert, E.V.; de Wild, J.; Dale, P. Reaction chemistry of group IV containing copper chalcogenide semiconductors  $\text{Cu}_2\text{MX}_3$  ( $\text{M} = \text{Sn, Ge}$  and  $\text{X} = \text{S, Se}$ ). *J. Alloy. Compd.* **2017**, *695*, 1307–1316, doi:10.1016/j.jallcom.2016.10.271.
3. Xue, D.-J.; Liu, S.-C.; Dai, C.-M.; Chen, S.; He, C.; Zhao, L.; Hu, J.-S.; Wan, L.-J. GeSe Thin-Film Solar Cells Fabricated by Self-Regulated Rapid Thermal Sublimation. *J. Am. Chem. Soc.* **2017**, *139*, 958–965, doi:10.1021/jacs.6b11705.
4. Irene, E.A.; Wiedemeier, H. ChemInform Abstract: THE SUBLIMATION KINETICS OF GESE SINGLE CRYSTALS. *Chem. Informationsdienst* **1975**, *6*, 182–192,, doi:10.1002/chin.197512025.
5. Khadka, D.B.; Kim, J. Band Gap Engineering of Alloyed  $\text{Cu}_2\text{ZnGe}_x\text{Sn}_{1-x}\text{Q}_4$  ( $\text{Q} = \text{S, Se}$ ) Films for Solar Cell. *J. Phys. Chem. C* **2015**, *119*, 1706–1713, doi:10.1021/jp510877g.
